# Supplementary material for: Lipid carriers for mRNA delivery
Source: PubMed Central journal article supplement — Acta Pharm Sin B. 2022 Nov 30;13(10):4105–26. doi: 10.1016/j.apsb.2022.11.026 (PMC10547918; doi:10.1016/j.apsb.2022.11.026), 2022-11-30

Supplementary information for

## **Lipid carriers for mRNA delivery**

**Wanting Zhang<sup>a</sup>, Yuxin Jiang<sup>a</sup>, Yonglong He<sup>a</sup>, Hamza Boucetta<sup>a</sup>, Jun Wu<sup>b,\*</sup>,**

**Zhongjian Chen<sup>c,\*</sup>, Wei He<sup>c,a,\*</sup>**

*<sup>a</sup>Department of Pharmaceutics, School of Pharmacy, China Pharmaceutical University, Nanjing 211198, China*

*<sup>b</sup>Department of Geriatric Cardiology, Jiangsu Provincial Key Laboratory of Geriatrics, the First Affiliated Hospital of Nanjing Medical University, Nanjing 210029, China*

*<sup>c</sup>Shanghai Skin Disease Hospital, Tongji University School of Medicine, Shanghai 200443, China*

Received 14 August 2022; received in revised form 26 October 2022; accepted 3

November 2022

\*Corresponding authors. Tel./fax: +86 25 86185328 (Wei He).

E-mail addresses: wujun9989@njum.edu.cn (Jun Wu), jian818@163.com

(Zhongjian Chen), weihe@cpu.edu.cn (Wei He).

**Table S1** Commonly used lipid materials for mRNA delivery.

| Classification | Name     | Structure                                                                            |
|----------------|----------|--------------------------------------------------------------------------------------|
| Neutral        | DOPE     | 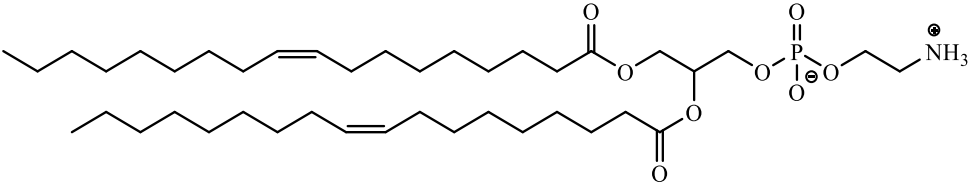   |
|                | DSPC     |   |
|                | DOPC     |   |
|                | DSPE-PEG |  |

PEG2000-DMG

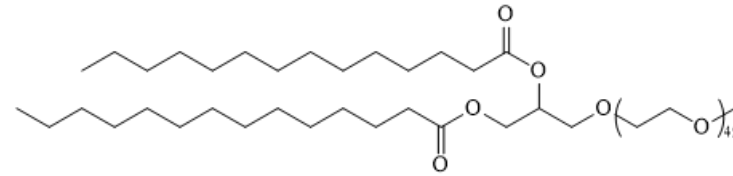

ALC-0159

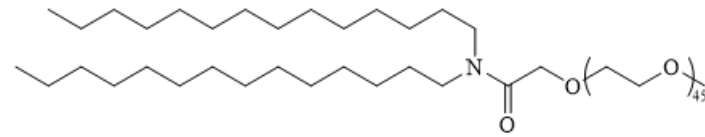

C24 alkyl phytosterol

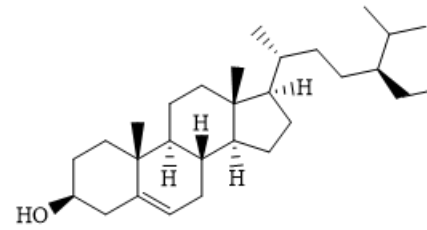

Chol

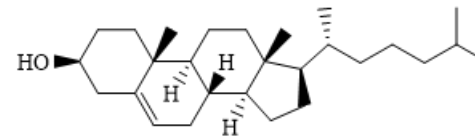

Cationic

DOTMA

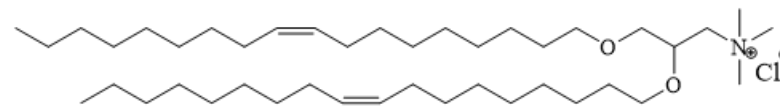

DOTAP

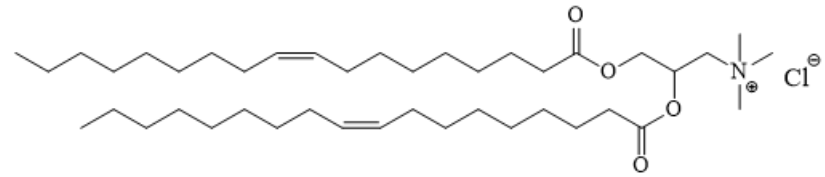

DOSPA

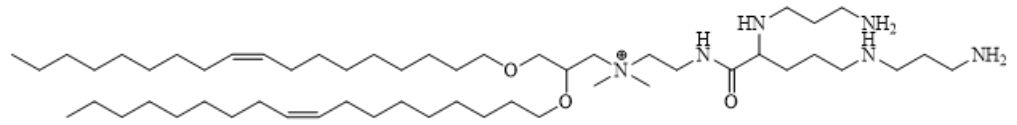

EPC

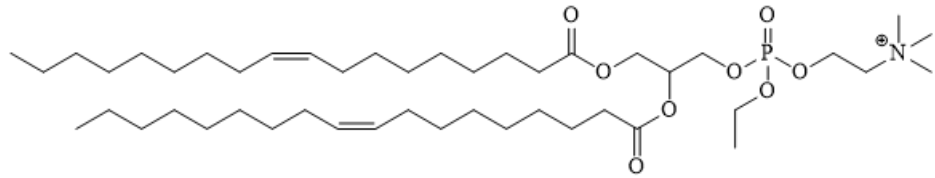

Ionizable

Dlin-MC3-DMA

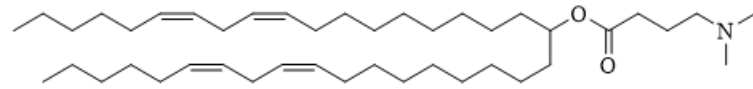

C12-200

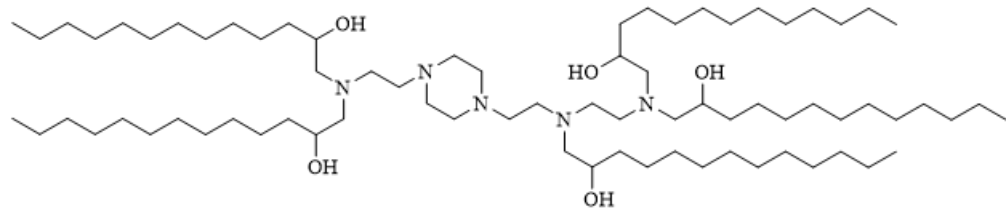

SM-102

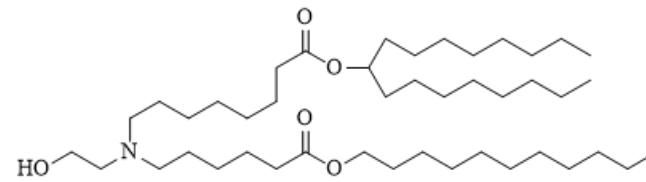

ALC-0315

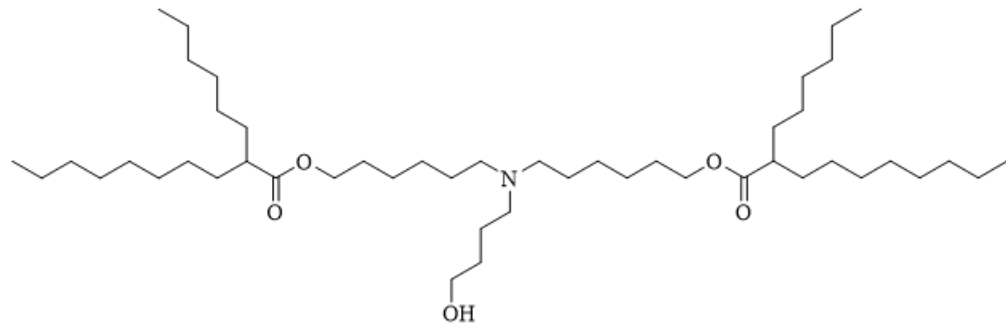

5A2-SC8

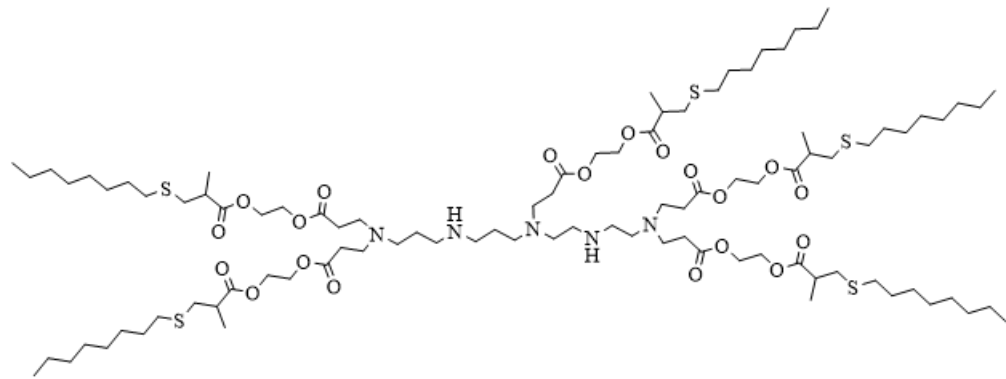

TT3

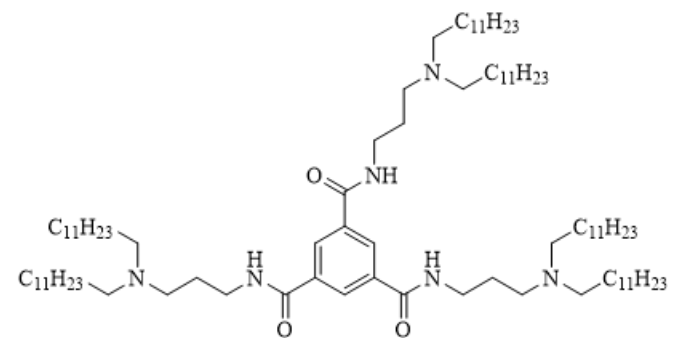

FTT5

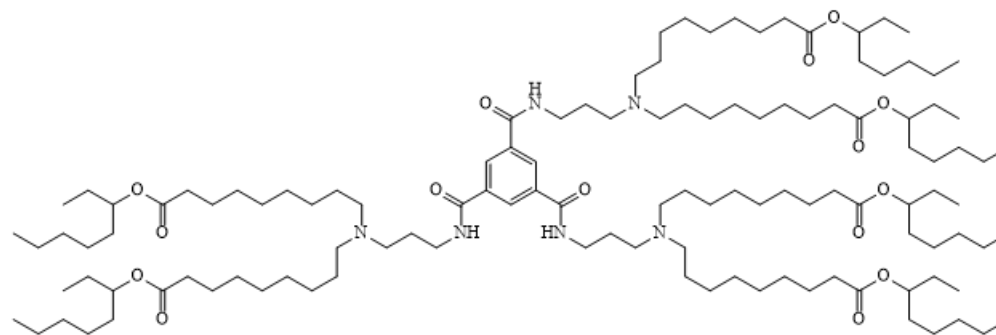

A18-Iso5-2DC18

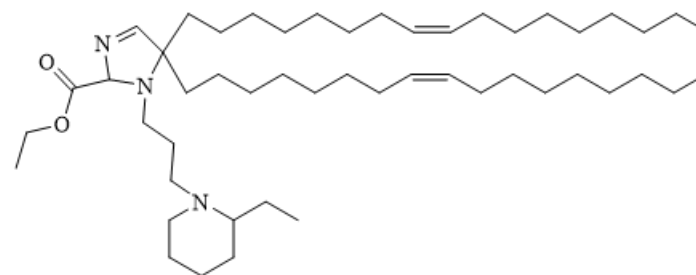

cKK-E12

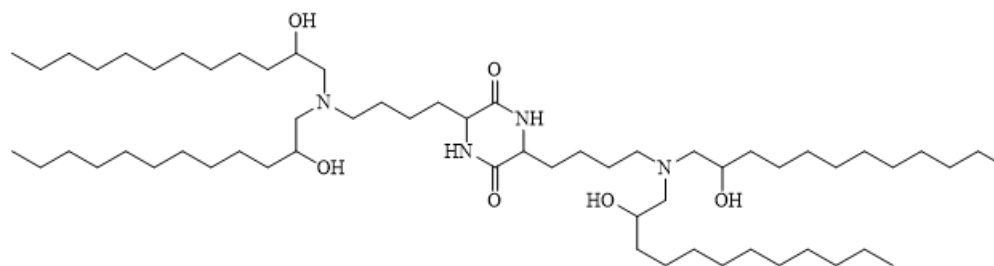

OF-Deg-Lin

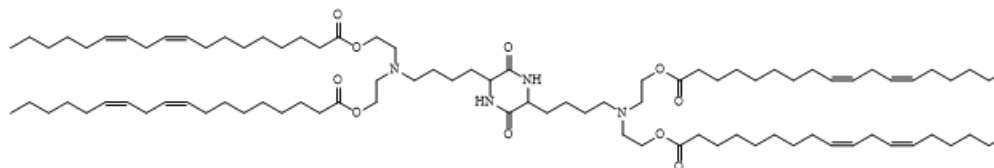

306O<sub>i10</sub>

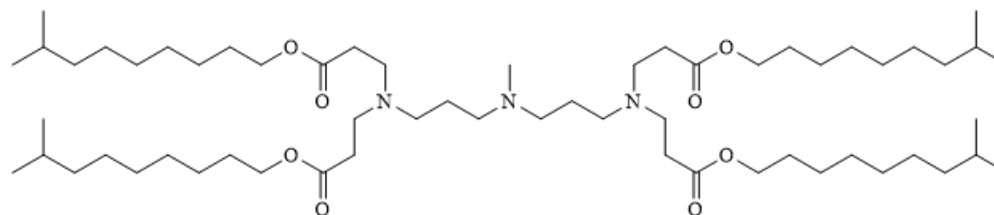

BAME-O16B

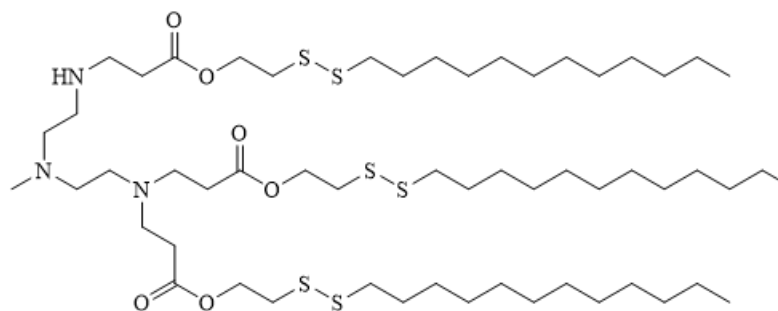

Anionic

9A1P9

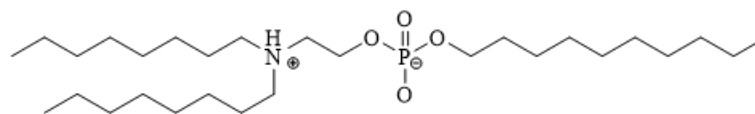

18PA

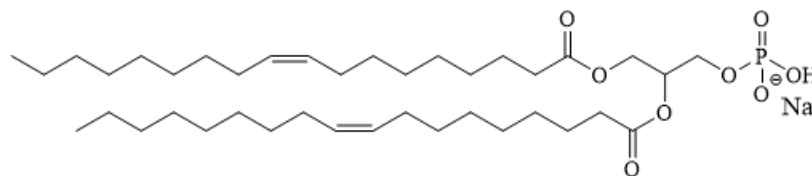

DOPS

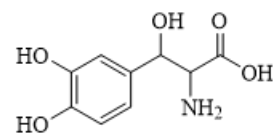

Supplement: mmc1.pdf [file mmc1.pdf]
